# Supplementary material for: Dependence of Successful Airway Management in Neonatal Simulation Manikins on the Type of Supraglottic Airway Device and Providers’ Backgrounds
Source: MDPI journal article supplement (doi:10.3390/children11050530), 2024-04-28
Supplement: s1 [file s1]

# インターサージカル ラリングマスク Solus 簡易取扱説明書

1.

エアを完全に脱気する

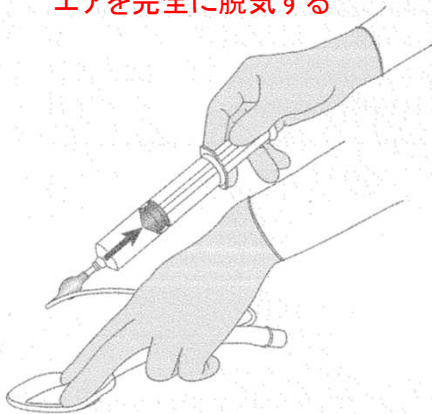

①本品を平面上に置き、シリンジなどでカフからエアを完全に脱気する。  
本品取扱の際は手術用グローブをご使用下さい。

2.

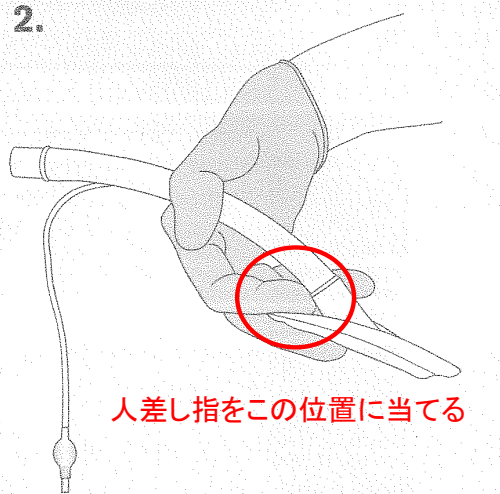

人差し指をこの位置に当てる

②カフ背面に水溶性潤滑剤を均一に塗付する。  
チューブとカフの間の接合部に人差し指の先を  
当てて挿入の準備をする。

3.

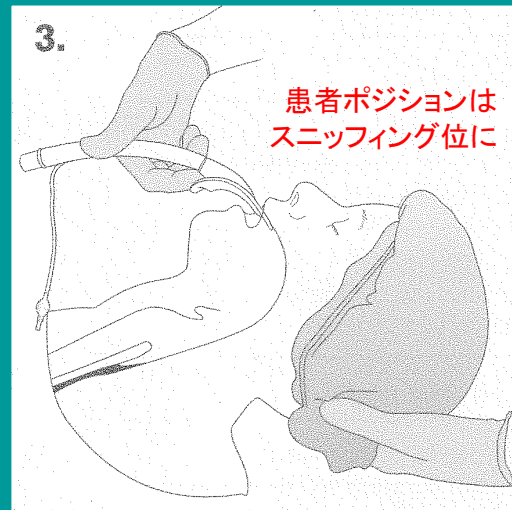

患者ポジションは  
スニッフィング位に

③患者の頭部はスニッフィング位にする。  
カフ先端の折れ曲がり注意到しながら、  
カフ背面を硬口蓋に軽く押し当てる。

4.

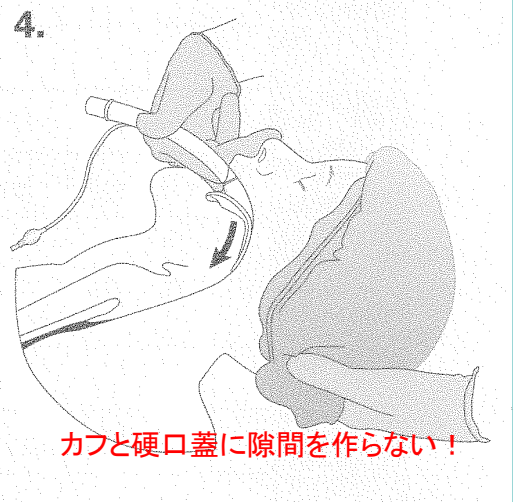

カフと硬口蓋に隙間を作らない！

④カフを押し当てたまま、人差し指を硬口蓋から  
軟口蓋へと沿わせて、抵抗を感じるまでカフを  
挿入する。

5.

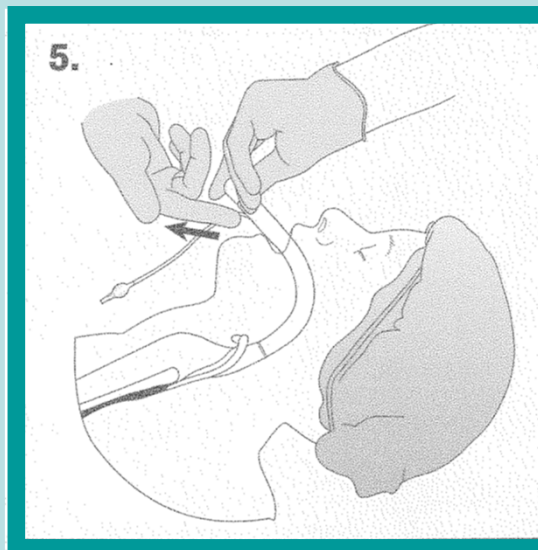

⑤別の手でカフの位置を保持しながら  
人差し指を放す。

6.

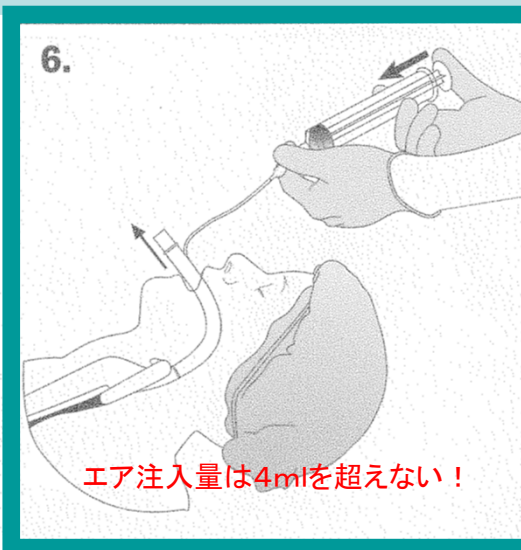

エア注入量は4mlを超えない！

⑥カフにエアを注入する。この時エアウェイ  
チューブに表示された推奨値(<4ml)を  
超えて注入しないこと。通常は推奨値以下で  
適切に閉塞できる。

# Solus 使用上の注意点

ご使用時には下記の点にご注意下さい。

- ・挿入時の患者ポジショニングは**スニッフィングポジション**です。

- ・**水溶性潤滑剤は“カフの背面”にのみ塗付して下さい。**

注意:カフ開口部(表面)への塗付は、潤滑剤の気道への落ち込みや、気道反射を誘発する可能性がありますので、絶対に行わないで下さい。

- ・サイズ1の**カフ注入量は4ml未満**です。

準備するシリンジは小さめのサイズを選択して下さい。

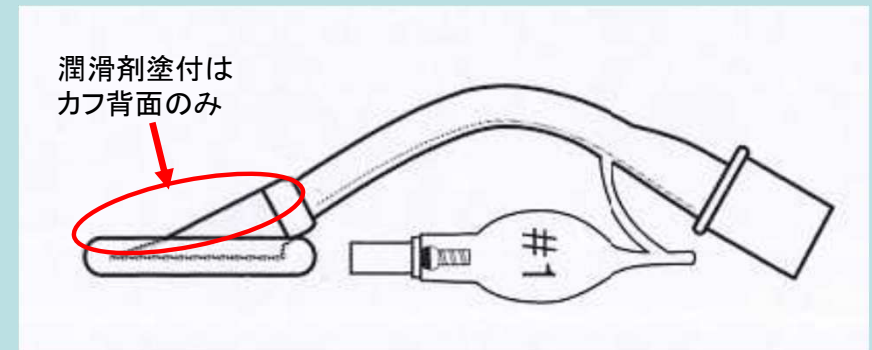

- ・挿入時は**カフを押し当てたまま**進めてください。カフと硬口蓋に隙間が出来ると、カフ先端部がめくれ返って、挿入困難になったり、挿入後にカフが適切に膨らまない可能性があります。
